# Supplementary material
Source: PubMed Central journal article supplement (PMC2906875)
Supplement: 1000395107_pnas.201000395SI.pdf [file 1000395107_pnas.201000395SI.pdf]

# Supporting Information

Sylvester et al. 10.1073/pnas.1000395107

## SI Methods

**Phylogeny of Cichlid *Irx1*.** Annotated sequences of zebrafish *Irx* proteins (ENSDARP00000007800, ENSDARP00000073569, ENSDARP00000016693, ENSDARP00000069381, ENSDARP00000042270, ENSDARP00000051692, ENSDARP00000052337, ENSDARP00000043856, ENSDARP00000045627, ENSDARP00000025947, NP\_001001405.1), as well as the *Irx1* proteins of *Fugu* (ENSTRUP00000018488, ENSTRUP00000029525), *Tetraodon* (ENSTNIP00000012127), *edaka* (ENSORLP00000006499, ENSORLP00000017930), *stickleback* (ENSGACP00000008692, ENSGACP00000011891), and an outgroup from *C. elegans* (C36F7.1),

were downloaded from the Refseq (release 31) and Ensembl (version 50) databases (1, 2). Together with the cichlid *Irx* sequence, a multiple sequence alignment was generated using Clustalw version 2.0.10 (3). Phylogenetic relationships between the gene sequences were determined using various programs of the PHYLIP package (version 3.67) (4). Here 1,000 bootstrap replicates of the multiple sequence alignment were generated using Seqboot, pairwise distance measurements were calculated using Protdist, neighbor-joining trees were constructed using Neighbor, and the final consensus tree, together with the bootstrap percentages, was generated with Consense.

1. Pruitt KD, Tatusova T, Maglott DR (2007) NCBI reference sequences (RefSeq): A curated non-redundant sequence database of genomes, transcripts and proteins. *Nucleic Acids Res* 35 (Database issue):D61–D65.
2. Flicek P, et al. (2008) Ensembl 2008. *Nucleic Acids Res* 36 (Database issue):D707–D714.

3. Larkin MA, et al. (2007) Clustal W and clustal X version 2.0. *Bioinformatics* 23: 2947–2948.
4. Felsenstein J (2007) *PHYLIP (Phylogeny Inference Package), version 3.67* (University of Washington, WA).

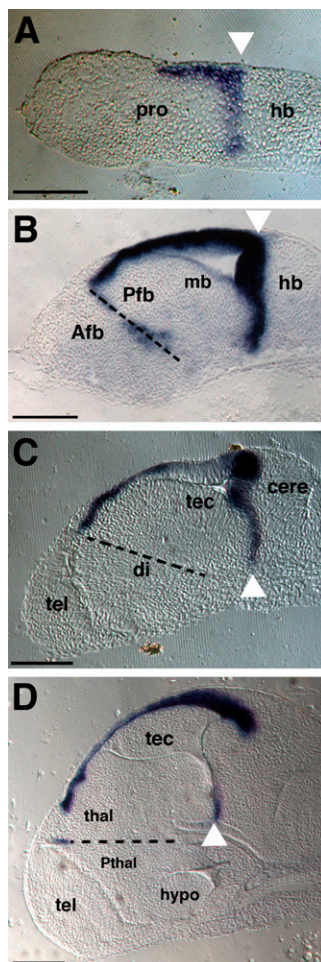

**Fig. S1.** Staging the cichlid brain. (A) ISH showing *wnt1* gene expression for *M. conophorus* (MC), at late stage 9. (B–D) The same species, gene expression, and layout as A. B, stage 12; C, stage 14; D, stage 16. White arrowheads mark the position of the MHB; dashed lines mark the position of the ZLI. (Scale bar: 100  $\mu$ m.) hb, hindbrain; pro, prosencephalon; mb, midbrain; Afb, anterior forebrain; Pfb, posterior forebrain; cere, cerebellum; tec, tectum; di, diencephalon; tel, telencephalon; thal, thalamus; Pthal, prethalamus; hypo, hypothalamus. All panels show a parasagittal section with the greatest dorsoventral extent, with anterior to the left.



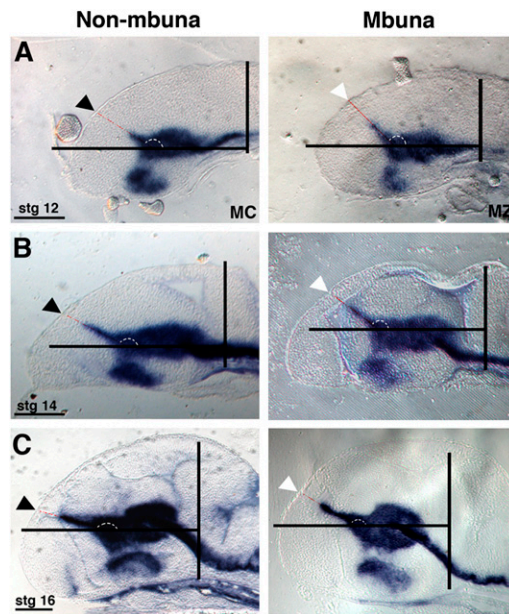

**Fig. S4.** The difference in angle of the ZLI, between lineages mbuna versus nonmbuna, is maintained throughout ontogeny. ISH for the gene *shh* depicting the angle of the ZLI across three developmental stages: 12 (*A*), 14 (*B*), and 16 (*C*); see Fig. 3. The ZLI is marked by the black arrowhead in nonmbuna (MC) and the white arrowhead in mbuna (MZ). The dotted red and white lines show the ZLI angle (*Methods*). As development progresses, the initial ZLI wedge narrows into a line and the ZLI angle increases. However, at each stage the average ZLI angle in nonmbuna is greater than that of mbuna (Fig. 3). (Scale bar: 100  $\mu\text{m}$ .) Panels are parasagittal sections, with anterior to the left.
